# Supplementary material for: Aqueous self-assembly of a charged BODIPY amphiphile via nucleation–growth mechanism
Source: Royal Society of Chemistry journal article supplement (doi:10.1039/c5cp00207a), 2015-01-01
Supplement: c5cp00207a1.pdf [file c5cp00207a1.pdf]

Supporting Information for

## Aqueous Self-Assembly of a Charged BODIPY Amphiphile via Nucleation-Growth Mechanism

Le Yang,<sup>a</sup> Gang Fan,<sup>a</sup> Xiangkui Ren,<sup>a</sup> Lingyun Zhao,<sup>b</sup> Jinkang Wang<sup>a</sup> and Zhijian Chen<sup>\*a</sup>

<sup>a</sup>School of Chemical Engineering and Technology, and Collaborative Innovation Center of Chemical Science and Chemical Engineering, Tianjin University, Tianjin, 300072, China. <sup>b</sup>Key Laboratory of Advanced Materials, School of Material Science & Engineering, Tsinghua University, Beijing, 100084, China.

zjchen@tju.edu.cn

### Table of Contents

1. General methods
2. Synthesis and characterization
3. Aggregation studies
4. References

### 1. General Methods

**Chemicals and Reagents:** All the chemicals used were analytical grade and were used without further purification unless otherwise stated. Ethyl magnesium bromide, iodomethane, 2,3-Dichloro-5,6-dicyano-1,4-benzoquinone (DDQ), 1-dimethylamino-2-propyne, trifluoroacetic acid (TFA),  $\text{BF}_3 \cdot \text{Et}_2\text{O}$ , 2,4-Dimethylpyrrole, and were purchased from commercial source. Dichloromethane (DCM) and triethylamine were distilled over  $\text{CaH}_2$  and stored under Ar. Silica gel (200-300 mesh) was used for column chromatography. 3,4,5-Tris(*n*-dodecyloxy)benzaldehyde<sup>1</sup> (compound **4**, Scheme S1) and BODIPY precursor **3**<sup>2</sup> were synthesized according to previously reported procedure.

**NMR spectroscopy:** <sup>1</sup>H and <sup>13</sup>C NMR spectra were recorded at 300 K on a Bruker (400 MHz or 500MHz) spectrometer using tetramethylsilane (TMS) as internal standard. Multiplicities for proton signals are abbreviated as *s*, *t*, and *m* for singlet, triplet, and multiplet, respectively.

**Mass spectrometry:** ESI mass spectra were measured with a Bruker Daltonics micrOTOF-QII LC-MS system.

**UV/Vis spectroscopy:** UV/Vis absorption spectra were recorded on an Agilent Technologies Cary 300 UV/Vis spectrophotometer equipped with a SPV 1×1 temperature controller. The solvents for spectroscopic studies were spectroscopic grade and used as received. The spectra were recorded in quartz glass cuvettes and the extinction coefficients  $\epsilon$  were calculated according to Lambert-Beer's law.

**Steady-State Fluorescence spectroscopy:** Fluorescence spectroscopic measurements were performed under ambient conditions on a calibrated FluoroLog-3 spectrofluorometer. All the fluorescence spectra were corrected. For the samples of dye aggregates with high optical densities, a front-face setup was used to minimize reabsorption. The fluorescence quantum yields were

determined using following equation according to the literature<sup>3</sup>:  $\Phi_{F(x)} = (A_s/A_x)(F_x/F_s)(n_x/n_s)^2\Phi_{F(s)}$ , where  $\Phi_{F(x)}$  is the fluorescence quantum yield,  $A$  is the absorbance at the excitation wavelength,  $F$  is the area under the corrected emission spectrum, and  $n$  is the refractive index of the solvents used. Subscripts “s” and “x” refer to the standard and to the unknown, respectively. Fluorescein in 0.1 M NaOH solution ( $\Phi_{F(s)} = 0.92$ ) was used as standard.

**Time-Resolved Fluorescence spectroscopy:** Fluorescence lifetimes were measured with a Horiba DeltaFlex TCSPC system equipped a NanoLED laser (445 nm, pulse width <200 ps) excitation source and a TBX picosecond photon detection module. The instrument response function was collected by scattering the exciting light of a dilute, aqueous suspension of Silica (LUDOX). Decay curves were evaluated using the software supplied with the instrument applying least square regression analysis. The quality of the fit was evaluated by analysis of  $\chi^2$  (0.9 – 1.1), as well as by inspection of residuals and autocorrelation function.

**Electron microscopy:** Transmission electron microscopy (TEM) measurements were performed on a Tecnai G<sup>2</sup> 20 S-TWIN Transmission Electron Microscope, operating at an acceleration voltage of 200 kV. For the observation of aggregates, a drop of sample solution (0.1-0.5 mg/mL) was placed on 400-mesh formvar copper grids coated with carbon. About 2 min after the deposition, the grid was tapped with filter paper to remove surface water. Staining was performed by addition of a drop of uranyl acetate aqueous solution (0.5 %) onto the copper grid. After 1 min, the surface liquid on the grid was removed by tapping with filter paper.

**Confocal laser scanning microscopy:** Confocal fluorescence images were recorded on a Zeiss LSM710 confocal laser scanning microscope (CLSM) (Jena, Germany). The excitation was performed with Ar lase at wavelengths of 488 nm, 543 nm, 594 nm, and the emission was monitored at 500-550 nm, 550-600 nm or 600-650 nm respectively. For the sample preparation, a method reported in literature was used.<sup>4</sup> An aqueous solution of gelatine (1mg/mL) was added into the dye aggregates at 40 °C and cooled to room temperature, and then the resultant viscous mixture was dropcast on untreated glass substrate for observation.

## 2. Synthesis and characterization

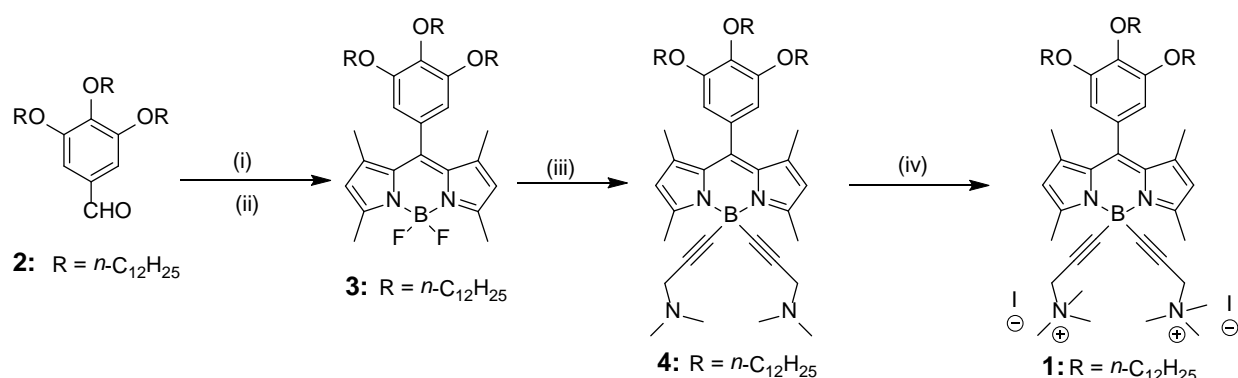

**Scheme S1.** Synthesis of BODIPY dye **1**. Reagents and conditions: (i) CF<sub>3</sub>COOH, CH<sub>2</sub>Cl<sub>2</sub>, DDQ, r.t., 2 h; (ii) BF<sub>3</sub>·Et<sub>2</sub>O, triethylamine, r.t., 30%; (iii) 1-dimethylamino-2-propyne, EtMgBr, THF, 60 °C, 12 h, 75%; (iv) CH<sub>3</sub>I, diethyl ether, 30 °C, 24 h, 94%.

### 4,4-difluoro-1,3,5,7-tetramethyl-8-(3,4,5-tris(dodecyloxy))-4-bora-3a,4a-diaza-s-indacene (**3**)<sup>2</sup>

3,4,5-Tris(dodecyloxy)benzaldehyde<sup>1</sup> (compound **2**) (1.3 g, 2.0 mmol) and 2,4-dimethylpyrrole (0.4 mL, 4.0 mmol) were dissolved in dry CH<sub>2</sub>Cl<sub>2</sub> (30 mL) under Ar. After stirring for 15 min, 0.036 mL TFA was added and the reaction was continued at room temperature for about 2 h. After the complete consumption of compound **2** (monitored by TLC), DDQ (8.5 mmol, 2.0 g) was added into the reaction mixture. After stirring for 2 h, triethylamine (10.0 mL, 57 mmol) and BF<sub>3</sub>·Et<sub>2</sub>O (10.0 mL, 79 mmol) were added subsequently. The reaction mixture was stirred at room temperature for 10 h. Then the solvent was evaporated under reduced pressure and the residue was purified by column chromatography (silica gel, CH<sub>2</sub>Cl<sub>2</sub>/*n*-Hexane = 1/1, v/v) to give an orange-colored viscous substance (0.53 g, 30%). <sup>1</sup>H NMR (400 MHz, CDCl<sub>3</sub>, 300K, TMS): δ = 6.47 (*s*, 2H), 5.99 (*s*, 2H), 3.96 (*qd*, *J* = 19.54), 2.55 (*s*, 6H), 1.87-1.70 (*m*, 6H), 1.53 (*s*, 6H), 1.49-1.39 (*m*, 6H), 1.26 (*m*, 48H), 0.89 (*m*, 9H).

### 4,4-bis-(3-dimethylamino-1-propynyl)-1,3,5,7-tetramethyl-8-(3,4,5-tris(dodecyloxy))-4-bora-3a,4a-diaza-s-indacene (**4**)

To a solution of 1-dimethylamino-2-propyne (0.14 g, 2.0 mmol) in dry THF (5 mL) under Ar in a flask, was added EtMgBr (1.0 M in THF, 1.7 mL) and the mixture was stirred at 60 °C for 2 h. Compound **3** (0.70 g, 0.79 mmol) was dissolved in a separate flask in dry THF (3 mL) under Ar, and then the solution was transferred via a cannula to the flask containing the Grignard reagent. The mixture was stirred at 60 °C for 2 h and then water (3 mL) was added. The mixture was extracted with CH<sub>2</sub>Cl<sub>2</sub> (20 mL × 3). After the solvent was evaporated under reduced pressure, the residue was purified by column chromatography (silica gel, CH<sub>2</sub>Cl<sub>2</sub> first, then CH<sub>2</sub>Cl<sub>2</sub>/MeOH = 3/1, v/v) to give a dark-orange solid (0.60 g, 75%). <sup>1</sup>H NMR (400 MHz, CDCl<sub>3</sub>, 300K, TMS): δ = 6.50 (*s*, 2H), 6.01 (*s*, 2H), 4.02 (*d*, *J* = 6.36 Hz, 2H), 3.91 (*t*, *J* = 6.53 Hz, 4H), 3.22 (*s*, 4H), 2.78 (*s*, 6H), 2.30 (*s*, 12H), 1.77 (*dd*, *J* = 14.22, 7.01 Hz, 6H), 1.52 (*s*, 6H), 1.48-1.39 (*m*, 6H), 1.25 (*m*, 48H), 0.88 (*m*, 9H). <sup>13</sup>C NMR (126 MHz, CDCl<sub>3</sub>): δ = 154.79, 154.14, 142.12, 141.65, 138.57, 129.88, 129.60, 121.55, 106.48, 86.60, 73.77, 69.48, 48.60, 43.30, 32.05-32.03, 29.87-29.72, 29.50-29.41, 26.24, 26.11, 22.81, 22.81-22.80, 16.27, 14.57, 14.24. MS (ESI, positive mode): calculated for C<sub>65</sub>H<sub>107</sub>BN<sub>4</sub>O<sub>3</sub> 1002.84, found: *m/z* [M+H]<sup>+</sup> 1003.86.

### 4,4-bis-(3-trimethylammonioiodine-1-propynyl)-1,3,5,7-tetramethyl-8-(3,4,5-tris(dodecyloxy))-4-bora-3a,4a-diaza-s-indacene (**1**)

Compound **4** (0.10 g) was stirred with iodomethane (3-5 equiv.) in dry diethyl ether at 30 °C for 24 h.

After cooling to room temperature, the precipitated solid was isolated by filtration, and then another time precipitated from CH<sub>2</sub>Cl<sub>2</sub> by the addition of Et<sub>2</sub>O to give an orange colored powder (0.12 g, 94%). <sup>1</sup>H NMR (400 MHz, CDCl<sub>3</sub>, 300K, TMS): δ = 6.50 (s, 2H), 6.12 (s, 2H), 4.71 (s, 4H), 4.02 (s, 2H), 3.94 (t, *J* = 5.70 Hz, 4H), 3.53 (s, 18H), 2.72 (s, 6H), 1.80-1.75 (m, 6H), 1.57 (s, 6H), 1.48-1.44 (m, 6H), 1.25 (m, 48H), 0.92-0.84 (m, 9H). <sup>13</sup>C NMR (126 MHz, CD<sub>3</sub>OD): δ = 156.21, 144.18, 143.71, 140.68, 133.16, 131.12, 129.03, 122.96, 111.12, 84.32, 66.87, 58.51, 53.37, 21.43, 16.72, 14.88. HRMS (ESI, positive mode): calculated for C<sub>67</sub>H<sub>113</sub>BN<sub>4</sub>O<sub>3</sub><sup>2+</sup> 1032.8895, found: m/z [M]<sup>2+</sup> 516.4491. Elemental analysis: Anal. calcd for C<sub>67</sub>H<sub>113</sub>BN<sub>4</sub>O<sub>3</sub>I<sub>2</sub>: C 62.51%, H 8.85%, N 4.35%; found: C 62.41%, H 8.81%, N 4.19%. UV/Vis (DMSO): λ<sub>max</sub>(ε) = 365 (6120 mol<sup>-1</sup> L cm<sup>-1</sup>), 471 (17400 mol<sup>-1</sup> L cm<sup>-1</sup>), 501 (89300 mol<sup>-1</sup> L cm<sup>-1</sup>). Fluorescence (DMSO): λ<sub>max</sub> = 510 nm; quantum yield: Φ<sub>fl</sub> = 0.17.

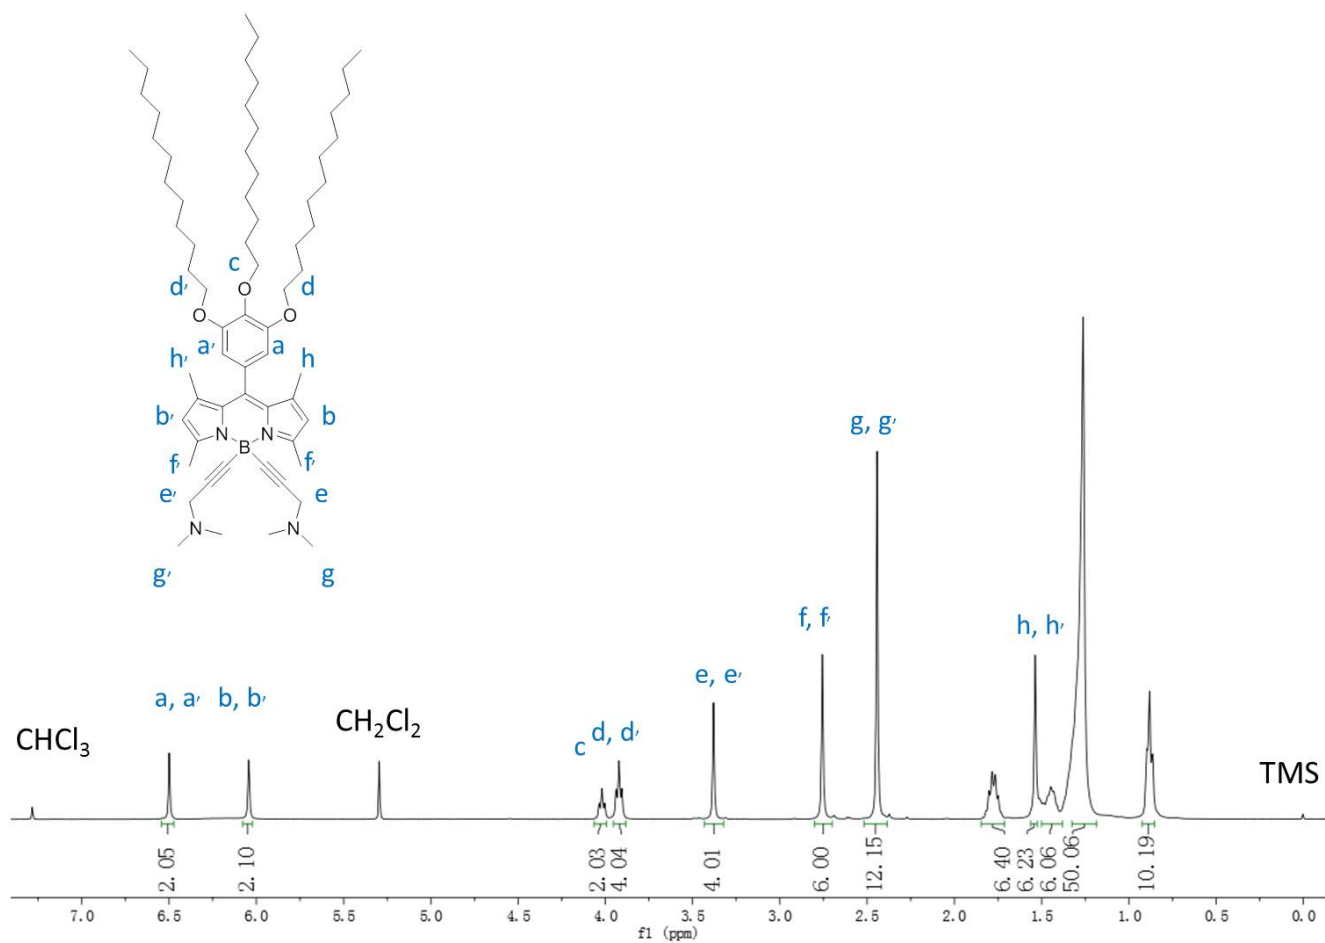

**Figure S1.** 400 MHz <sup>1</sup>H NMR spectrum with corresponding assignments and chemical structure of dye **4** in CDCl<sub>3</sub>.

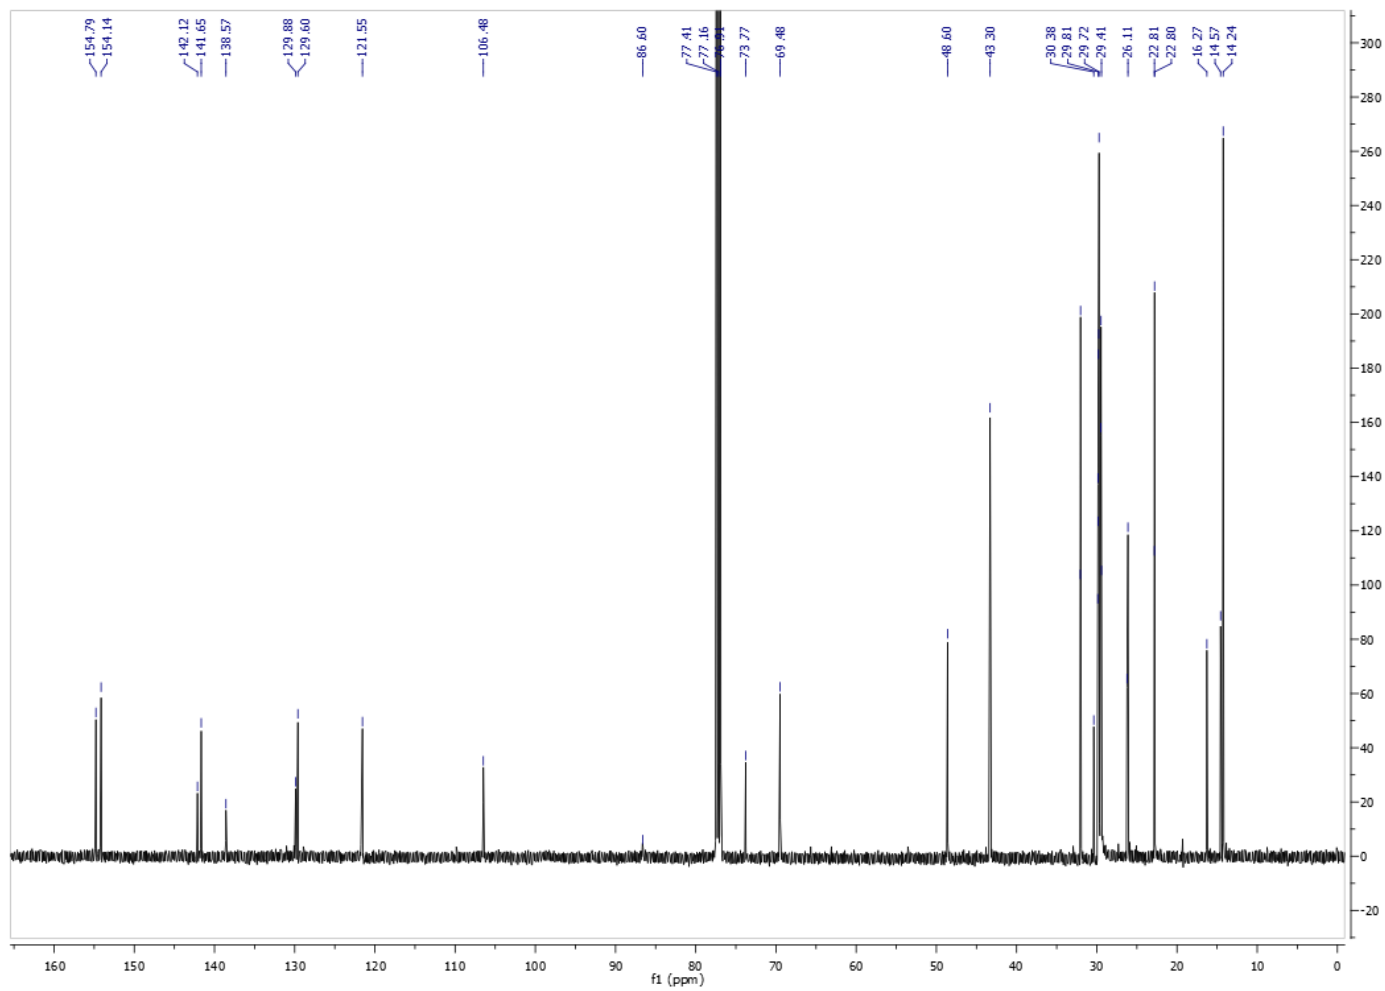

**Figure S2.** 126 MHz  $^{13}\text{C}$  NMR spectrum of dye **4** in  $\text{CDCl}_3$ .

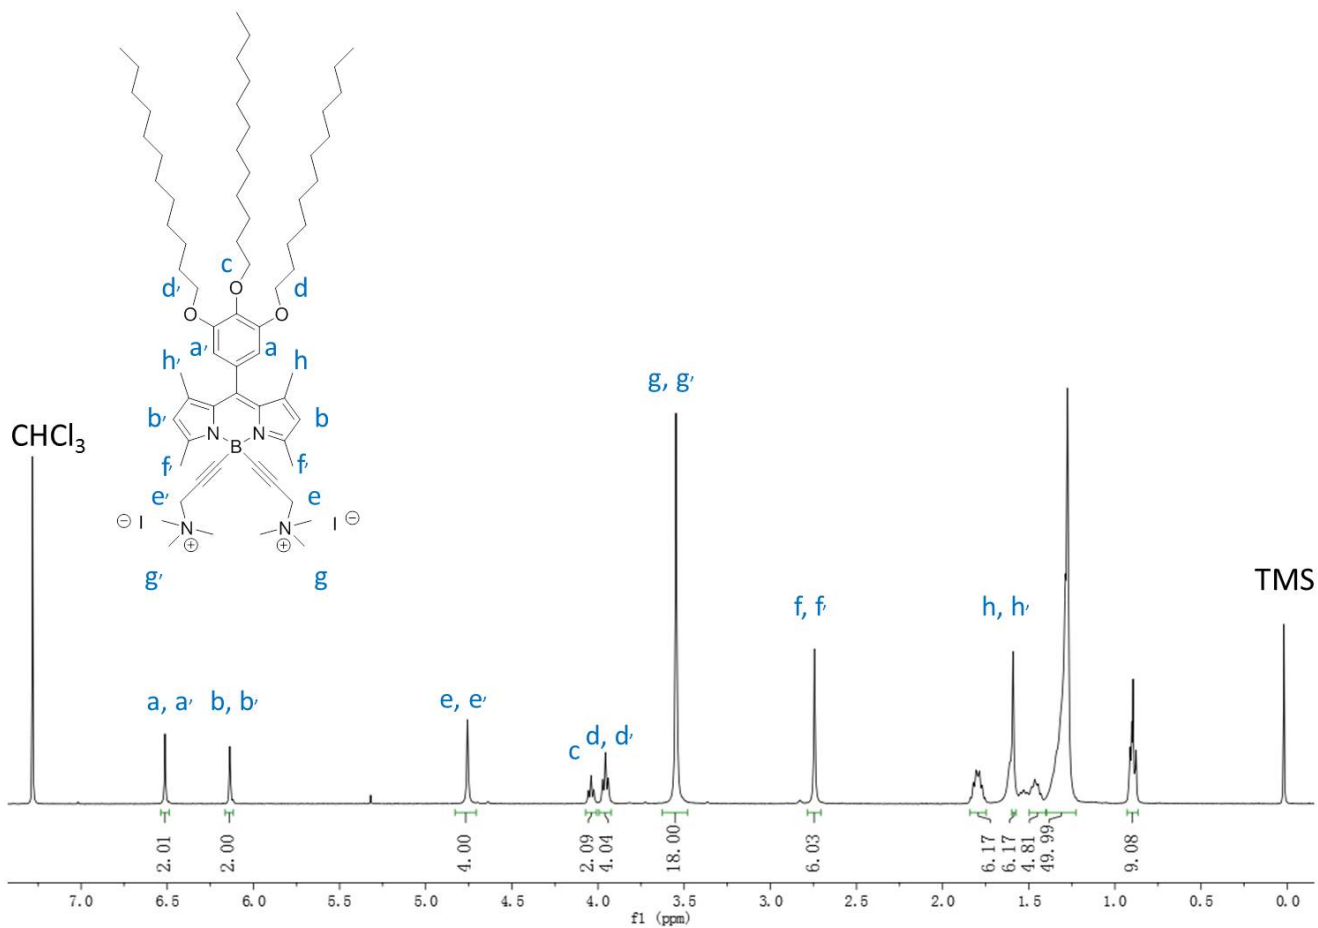

**Figure S3.** 400 MHz  $^1\text{H}$  NMR spectrum with corresponding assignments and chemical structure of dye **1** in  $\text{CDCl}_3$ .

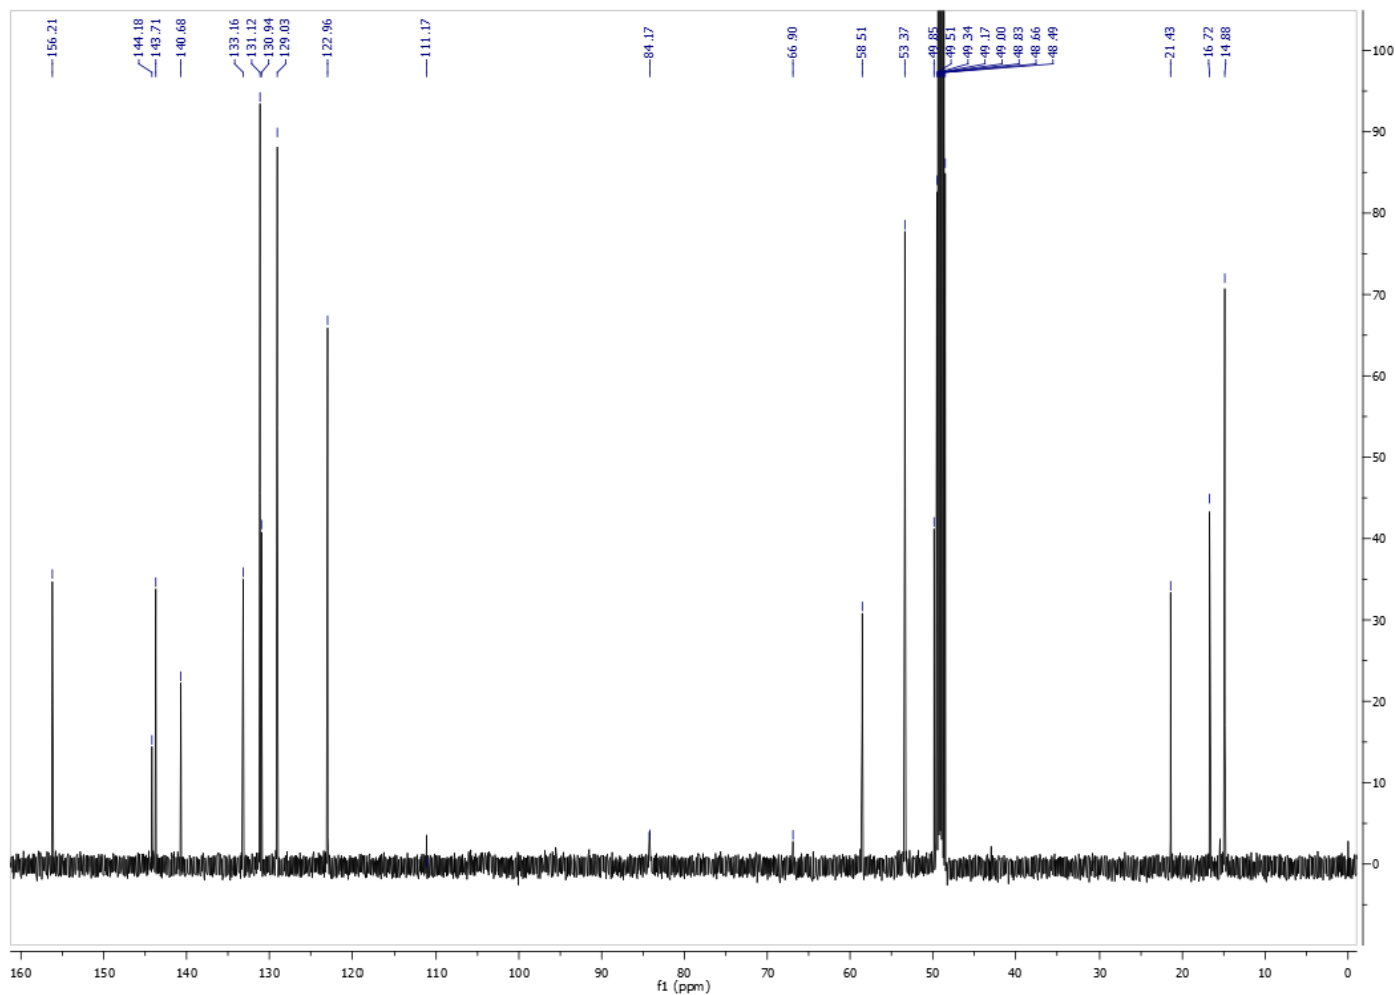

**Figure S4.** 126 MHz  $^{13}\text{C}$  NMR spectrum of dye **1** in  $\text{CD}_3\text{OD}$ .



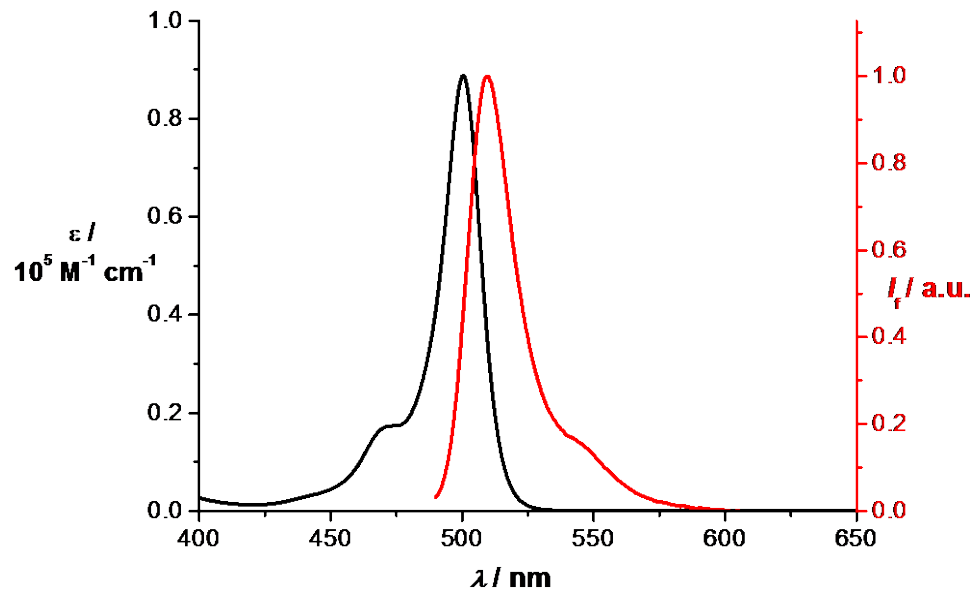

**Figure S5.** UV/Vis absorption and fluorescence spectra of **1** in DMSO at concentrations of  $2.0 \times 10^{-6} \text{ M}$  ( $\lambda_{\text{ex}} = 470 \text{ nm}$ ).

### 3. Aggregation studies

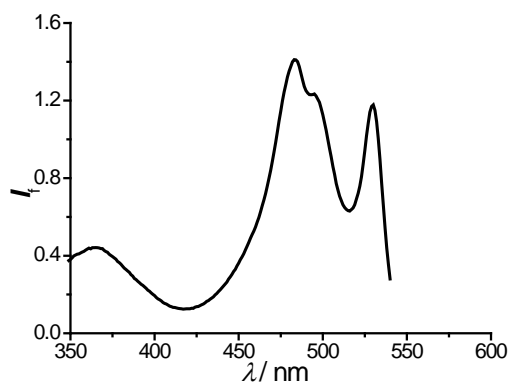

**Figure S6.** Fluorescence excitation spectrum of the aggregates of dye **1** ( $1.0 \times 10^{-5}$  M) in water monitored at 550 nm.

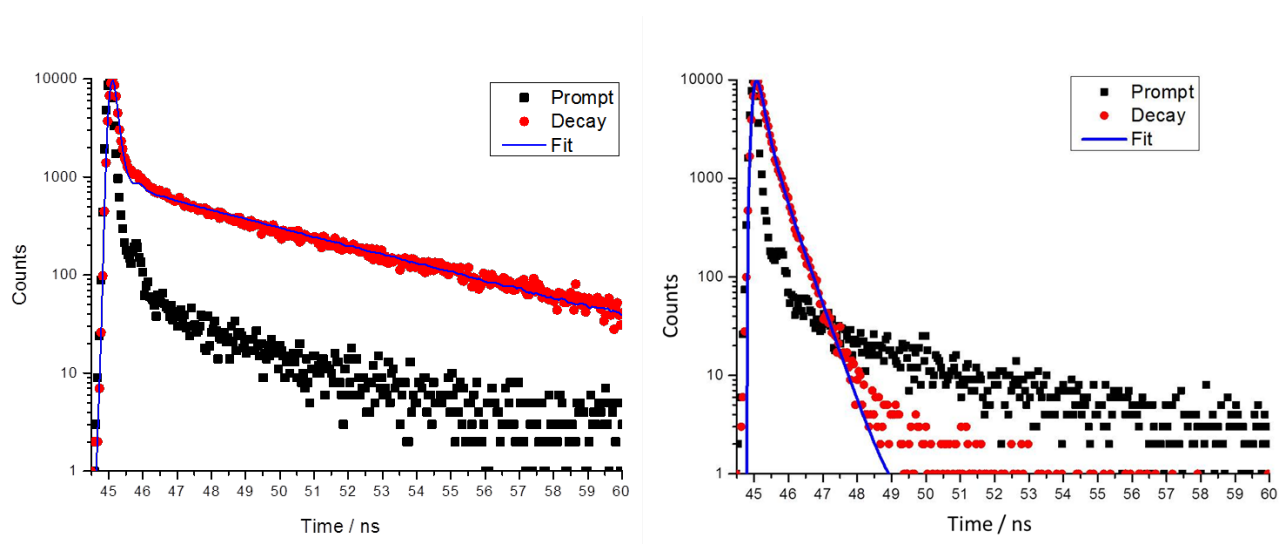

**Figure S7.** The fluorescence decay curves of the monomer ( $\lambda_{\text{detection}} = 580$  nm) and aggregates ( $\lambda_{\text{detection}} = 580$  nm) of dye **1** in water. The curves were fitted with two-exponential decay function and the lifetime  $\tau$  was calculated as an amplitude-averaged decay time. For the monomer,  $\tau_{\text{mono}} = (51.87\% \times 0.1 \text{ ns}) + (48.13\% \times 5.0 \text{ ns}) = 2.5 \text{ ns}$ ,  $\chi^2 = 1.06$ . For the aggregates,  $\tau_{\text{agg}} = (53.61\% \times 0.2 \text{ ns}) + (46.39\% \times 0.5 \text{ ns}) = 0.3 \text{ ns}$ ,  $\chi^2 = 0.99$ .

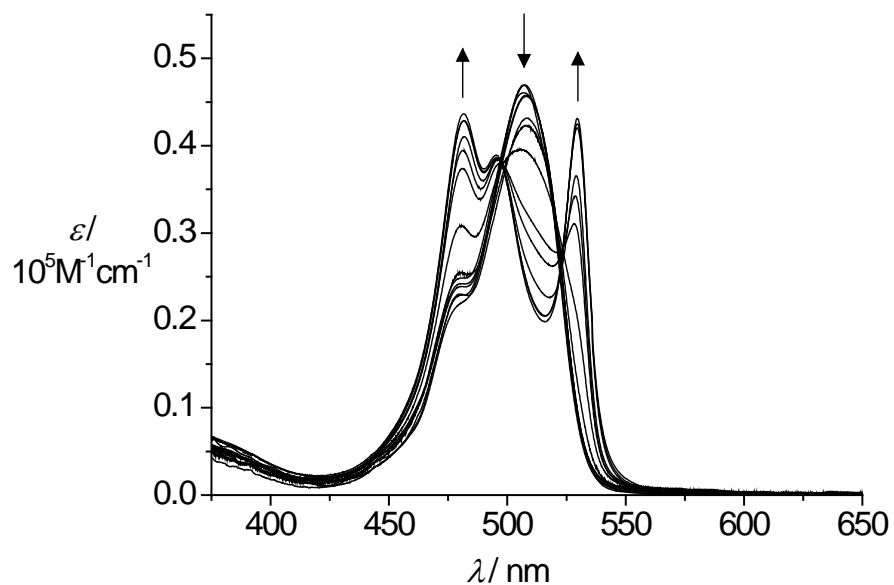

**Figure S8.** Concentration-dependent UV/Vis absorption spectra of dye **1** in water with concentration increasing from  $2 \times 10^{-7}$  to  $5 \times 10^{-4}$  M.

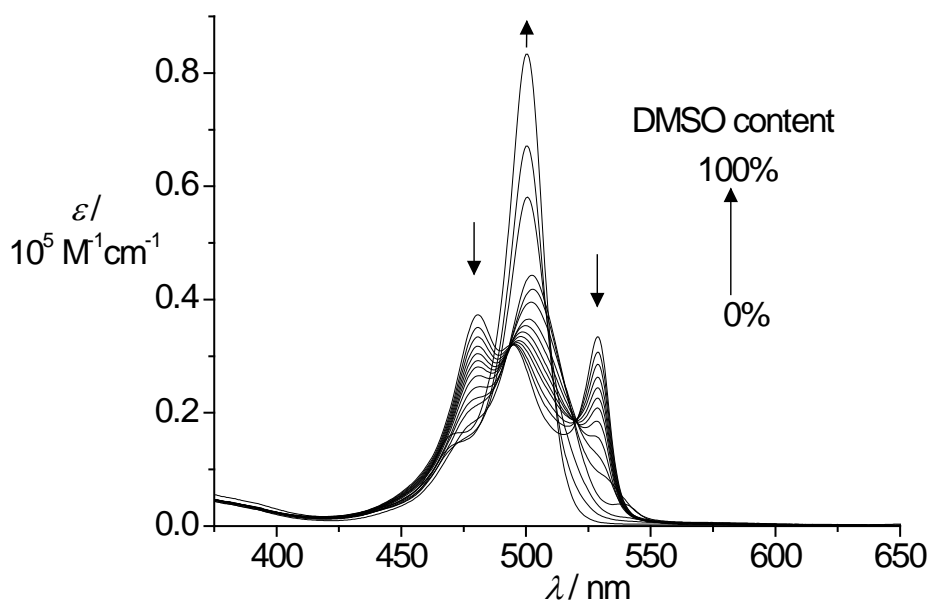

**Figure S9.** UV/Vis absorption spectra of **1** ( $1.0 \times 10^{-5}$  M) in DMSO-containing water with increasing DMSO content (0% to 100 %, v/v).

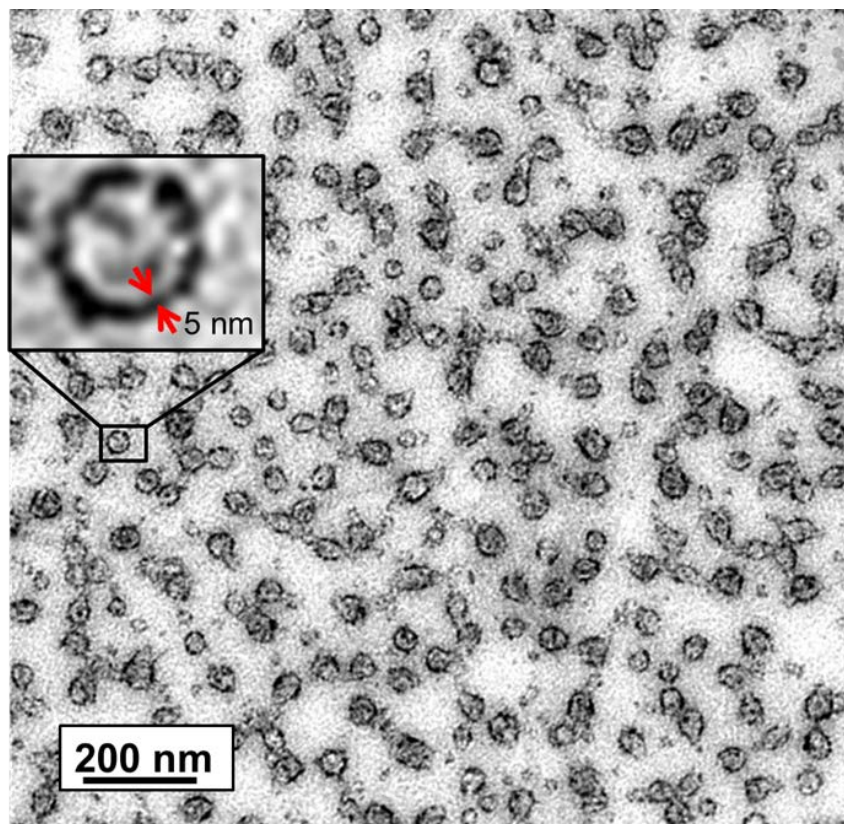

**Figure S10.** TEM image of the aggregates of dye **1** in DMSO-containing water ( $[1] = 0.1$  mg/mL, DMSO content 0.5%, v/v).

### Estimation of Critical Packing Parameter ( $P_c$ ) for Dye **1**

According to Israelachvili,<sup>5</sup>  $P_c$  can be estimated from the equation (1),

$$P_c = \frac{v}{a_0 \times l_c} \quad (1)$$

where  $v$  is the volume of an individual molecule,  $a_0$  stands for the optimal area occupied by the hydrophilic part, and  $l_c$  stands for the length of the molecule. For dye **1**,  $a_0 = 2 \times 0.47$  nm<sup>2</sup> (for one quaternary ammonium groups,<sup>6</sup>  $a_0 = 0.47$  nm<sup>2</sup>),  $l_c = 2.5$  nm (based on molecular modeling). The volume of dye **1**  $v$  can be considered as the sum of two parts, i.e. the three dodecyl chains ( $v_1$ ) and the rest of the molecule ( $v_2$ ). The value of  $v_1$  can be obtained from equation (2),<sup>5</sup>

$$v_1 = 3 \times (27.4 + 26.9n) \times 10^{-3} \text{ nm}^3 \quad (2)$$

where  $n$  is the number of carbon atoms. For  $n = 12$ ,  $v_1 = 1.05$  nm<sup>3</sup> can be calculated.

The value of  $v_2$  can be estimated by  $v_2 = m / \rho$ , where  $m$  is the mass of this part and  $\rho$  is the density obtained from the crystallographic data of related BODIPYs.<sup>7</sup> Accordingly,  $v_2 = (1.29 \times 10^{-21} \text{ g}) / (1.4 \text{ g/cm}^3) = 0.92$  nm<sup>3</sup>.

The critical packing parameter of dye **1** can be calculated as:

$$P_c = \frac{v}{a_0 \times l_c} = \frac{1.05 + 0.92}{0.94 \times 2.5} = 0.84$$

## Aggregation mechanism studies

### Studies based on the temperature-dependent UV/Vis spectroscopic data according to isodesmic and nucleation-growth model<sup>8</sup>

The fraction of aggregated molecules  $\alpha_{agg}$  at a certain concentration and temperature can be estimated according to equation (3) based on the assumption that the dye molecules aggregate fully ( $\alpha_{agg} = 1$ ) at lowest temperature ( $T = 0^\circ\text{C}$ ) or highest concentration ( $c = 5 \times 10^{-4}$  M) and stay in monomers ( $\alpha_{agg} = 0$ ) at highest temperature ( $T = 60^\circ\text{C}$ ) or lowest concentration ( $c = 2 \times 10^{-7}$  M) in water,  $\varepsilon_{mon}$  and  $\varepsilon_{agg}$  stands for absorption coefficients of the monomer and fully aggregated state respectively.

$$\alpha_{agg}(T) = 1 - \frac{\varepsilon(T) - \varepsilon_{agg}}{\varepsilon_{mon} - \varepsilon_{agg}} \quad (3)$$

For isodesmic model, the Gibbs free energy change of each step of adding a new monomer to the aggregate is the same. Accordingly, the fraction of aggregated species ( $\alpha_{agg}$ ) in temperature-dependent experiments can be described as equation (4):

$$\alpha_{agg} = \frac{1}{1 + \exp(-0.908\Delta H \frac{T - T_m}{RT_m})} \quad (4)$$

In this equation,  $\Delta H$  is the enthalpy release,  $R$  is the ideal gas constant.  $T_m$  is the “melting temperature” of the aggregates (when  $T = T_m$ ,  $\alpha_{agg} = 0.5$ ).

For the nucleation-growth model, the cooperative aggregation process can be described as two steps: nucleation and elongation. In the elongation regime, the molar fraction of aggregated dye ( $\alpha_{agg}$ ) can be expressed as equation (5)

$$\alpha_{agg} = 1 - \exp[\frac{-\Delta H_e}{RT_e^2} (T - T_e)] \quad (5)$$

Here,  $\Delta H_e$  is the enthalpy corresponding to elongation regime,  $T$  is the temperature,  $T_e$  is the elongation temperature,  $R$  is the ideal gas constant and  $\alpha_{SAT}$  is a parameter introduced to ensure that  $\alpha_{agg} / \alpha_{SAT}$  does not exceed unity. At the temperature above  $T_e$  (nucleation regime), the fraction of aggregated molecules in the nucleation regime can be described as equation (6):

$$\alpha_{agg} = K_a^{1/3} \exp[(2/3K_a^{-1/3} - 1) \frac{\Delta H_e}{RT_e^2} (T - T_e)] \quad (6)$$

In this equation,  $\Delta H_e$ ,  $T$  and  $T_e$  are the same as equation (6) and  $K_a$  is the dimensionless equilibrium constant of the activation.

The average length of the stack  $\langle N_n \rangle$  at the  $T_e$  is given by Equation (7).

$$\langle N_n(T_e) \rangle = \frac{1}{K_a^{1/3}} \quad (7)$$

## Studies based on concentration-dependent UV/Vis spectroscopic data according to the Goldstein-Stryer model<sup>9</sup>

In this model, a nucleus of size  $s$  is formed in the nucleation regime through a isodemic process with an equilibrium constant  $K_s$  while further steps of adding more molecules to the nucleus take place with equal equilibrium constant  $K$  ( $K > K_s$ ), i.e.  $K_1 = K_2 = \dots = K_s$  and  $K_{s+1} = K_{s+2} = \dots = K$ . The cooperativity is reflected by the parameter  $\sigma$  defined as  $\sigma = K_s/K$ . The relation between  $Kc_T$  and  $Kc_1$  can be described as the equation (8), where  $c_1$  is the concentration of the monomer species and  $c_T$  is the total concentration of the molecules:

$$Kc_T = \sum_{n=1}^s n\sigma^{n-1}(Kc_1)^n + \sum_{n=s+1}^{\infty} n\sigma^{s-1}(Kc_1)^n$$
$$= \frac{s(Kc_1)^s \sigma^{s-1}}{1 - Kc_1} + \frac{(Kc_1)^{s+1} \sigma^{s-1}}{(1 - Kc_1)^2} + \frac{Kc_1(s(\sigma Kc_1)^{s-1} - 1)}{\sigma Kc_1 - 1} - \frac{\sigma(Kc_1)^2((\sigma Kc_1)^{s-1} - 1)}{(\sigma Kc_1 - 1)^2} \quad (8)$$

In the meantime,  $\alpha_{agg}$  can be calculated from equation (9):

$$\alpha_{agg} = 1 - \alpha_{mon} = 1 - \frac{Kc_1}{Kc_T} \quad (9)$$

Both  $\alpha_{agg}$  and  $Kc_T$  can be obtained from the data of  $Kc_1$  and the curve of  $\alpha_{agg}$  against  $Kc_T$  can be drawn. The experiment data from three different wavelengths were collected and manually fitted into the curve for the best match, the result presented in the paper was the average value.

## 4. References

- 1 F. Cheng and A. Adronov, *Chem. Eur. J.*, 2006, **12**, 5053.
- 2 V. R. Donuru, G. K. Vegesna, S. Velayudham, G. Meng and H. Liu, *Journal of Polymer Science: Part A: Polymer Chemistry*, 2009, **47**, 5354.
- 3 S. Fery-Forgues and D. Lavabre, *J. Chem. Educ.*, 1999, **76**, 1260.
- 4 J. M. F. Hoeben, O. I. Shklyarevskiy, J. M. Pouderoijen, H. Engelkamp, P. H. J. A. Schenning, C. M. P. Christianen, C. J. Maan and E. W. Meijer, *Angew. Chem. Int. Ed.*, 2006, **45**, 1232.
- 5 J. Israelachvili, *Intermolecular and Surface Forces*, 2<sup>nd</sup> ed., Academic Press, San Diego, 1991.
- 6 E. Yu. Bryleva, N. A. Vodolazkaya, N. O. Mchedlov-Petrossyan, L.V. Samokhina and N.A. Matveevskaya, *Functional Materials*, 2006, **13**, 662.
- 7 (a) Y. Chen, L. Wan, D. Zhang, Y. Bian and J. Jiang, *Photochem. Photobiol. Sci.*, 2011, **10**, 1030;  
(b) C. Goze, G. Ulrich and R. Ziessel, *Org. Lett.*, 2006, **8**, 4445.
- 8 P. Jonkheijm, P. Van der Schoot, A. P. H. J. Schenning and E. W. Meijer, *Science*, 2006, **313**, 80.
- 9 G. Fernández, M. Stolte, V. Stepanenko and F. Würthner, *Chem. Eur. J.*, 2013, **19**, 206.
